# Supplementary material for: A novel bulk heterojunction solar cell based on a donor–acceptor conjugated triphenylamine dye
Source: Royal Society of Chemistry journal article supplement (doi:10.1039/c0cc03925j), 2010-11-09
Supplement: c0cc03925j.pdf [file c0cc03925j.pdf]

## Supplemental Information

### A novel buck heterojunction solar cell based on donor-acceptor conjugated triphenylamine dye

Qisheng Liu,<sup>a</sup> Kejian Jiang,<sup>\*a</sup> Bo Guan,<sup>a</sup> Zhengming Tang<sup>b</sup> and Yanlin Song<sup>\*a</sup>

<sup>a</sup> Beijing National Laboratory for Molecular Sciences (BNLMS), Key Laboratory of Organic Solids, Laboratory of New Materials, Institute of Chemistry, Chinese Academy of Sciences, Beijing, People's Republic of China, 100190, E-mail: [kjjiang@iccas.ac.cn](mailto:kjjiang@iccas.ac.cn); [ylsong@iccas.ac.cn](mailto:ylsong@iccas.ac.cn)

<sup>b</sup> Beijing National Laboratory for Molecular Sciences (BNLMS), The Key Lab of Bioorganic Chemistry and Molecular Engineering College of Chemistry, Peking University, Beijing, People's Republic of China, 100871.

#### 1. Measurement of film morphologies by AFM

The morphologies of BzTCA : PCBM film with different weight ratios (1:1, 1:2 and 1:3, by weight) were measured by AFM. The measured substrates are indium tin oxide (ITO) spin-coated with a 40-nm layer of BzTCA : PCBM with various blend ratios. AFM images are collected under ambient conditions using the Innova scanning probe microscope (Veeco). Silicon probes with spring constants of  $\sim 5 \text{ N m}^{-1}$  and resonant frequencies of 75 KHz (Budget Sensors) were used for tapping mode AFM measurements.

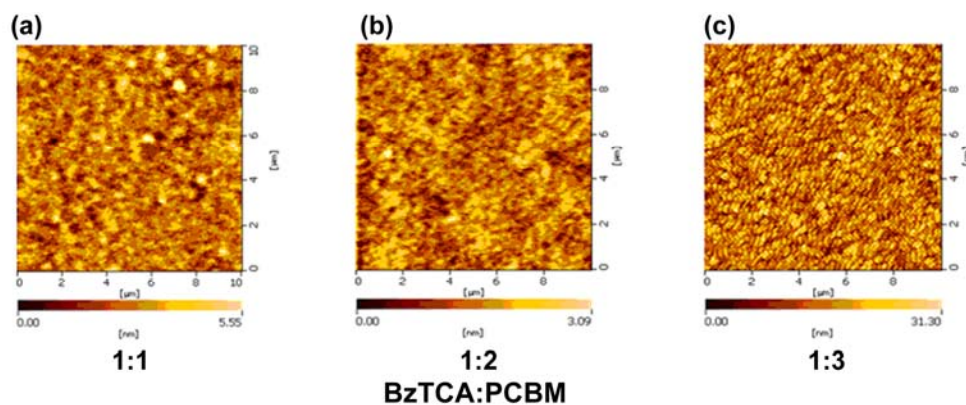

Fig. S1 AFM images of bulk heterojunction solar cells with various blend ratio of BzTCA : PCBM at 1:1 (a); 1:2 (b) and 1:3 (c).

#### Reference

1. Z. M. Tang , T. Lei , K. J. Jiang, Y. L. Song and J. Pei, Chemistry-An Asian Journal, 2010, 5, 1455.
